# Supplementary material
Source: MDPI journal article supplement (https://www.mdpi.com/2075-163X/11/12/1400)
Supplement: s1 [file s1]

**Table S1.** Samples of group 1. The table includes the fragment label (ID), the number of shards analyzed (S), identification of the slab (if known), a short description and the relevant bibliography. Most data were retrieved from the Stanford Digital *Forma Urbis Romae* project (<http://formaurbis.stanford.edu>).

| ID        | S | Slab   | Description                                                                                                                                                                                                                                                                                                                                                    | Bibliography  |
|-----------|---|--------|----------------------------------------------------------------------------------------------------------------------------------------------------------------------------------------------------------------------------------------------------------------------------------------------------------------------------------------------------------------|---------------|
| 1abcde    | 3 | XI-6   | The inscriptions label two buildings possibly the Imperial changing station ( <i>mutatorium Caesaris</i> ) and a customs post or vegetable market outside the porta Capena ( <i>area radicularia</i> ). The vertical streets that traverses the entire slab are identified as the New Street ( <i>via Nova</i> ) and maybe the Appian Way ( <i>via Appia</i> ) | [1,18,73]     |
| 7abcd     | 4 | IX-6   | Three buildings are engraved: the <i>Circus Maximus</i> , the Arch of Titus and the <i>Septizodium</i>                                                                                                                                                                                                                                                         | [18,74–77]    |
| 10abcde   | 3 | VIII-3 | Residential and commercial Subura district. The horizontal street that traverses the fragments correspond to the <i>Vicus Sabuci</i>                                                                                                                                                                                                                           | [40,41,77]    |
| 10opqr    | 3 | VIII-3 | Large section of the residential and commercial district called the Subura. The inscription on fragments 10p, an 10q identified the porticoed structure as the Porticus of Livia. On the right side of these fragments a monumental building identified as the Baths of Trajan is visible.                                                                     | [41,78,79]    |
| 33abc     | 3 | V-17   | The fragments could contain the representation of the huge artificial reservoir called the <i>Naumachia Transtiberina</i> of Augustus. The building at middle left of group 33 could be a barracks ( <i>Castra Ravennatium?</i> )                                                                                                                              | [18,80,81]    |
| 35ab      | 1 | IV-5   | Fragments depict the <i>Porticus Divorum</i> that served as a precinct for the temples of the deified Vespasian and Titus                                                                                                                                                                                                                                      | [82–84]       |
| 35cdefghi | 1 | IV-5   | The inscriptions label two buildings: the <i>Porticus Divorum</i> and the temple of <i>Minerva Calcidica</i>                                                                                                                                                                                                                                                   | [82–84]       |
| 35lpqr    | 1 | IV-5   | The inscription labels a rectangular space identified as the <i>Diribitorium</i> . The <i>Saepta Iulia</i> porch is also visible                                                                                                                                                                                                                               | [1,85,86]     |
| 41abc     | 3 | I-10   | The inscription identifies the Mausoleum of Hadrian                                                                                                                                                                                                                                                                                                            | [1,18]        |
| 57abc     | 2 | -      | The fragments show the inscription H [.] [---]                                                                                                                                                                                                                                                                                                                 | [1,18]        |
| 165abd    | 3 | -      | The fragments show a group of buildings not identified                                                                                                                                                                                                                                                                                                         | [1,18]        |
| 277ab     | 4 | -      | The fragments show a section of residential and commercial buildings                                                                                                                                                                                                                                                                                           | [1,18]        |
| 336ab     | 2 | -      | The fragments show a group of rooms and environments not identified                                                                                                                                                                                                                                                                                            | [1]           |
| 362ab     | 2 | -      | The fragments depict the horizontal inscription [---] MAGNI                                                                                                                                                                                                                                                                                                    | [1,18]        |
| 496ab     | 2 | -      | The fragments represent groups of rooms, a staircase and an internal portico with columns                                                                                                                                                                                                                                                                      | [1]           |
| 538abdefg | 2 | IV-4   | The fragments show different buildings on the slopes of the Quirinal                                                                                                                                                                                                                                                                                           | [1,88]        |
| 586ab     | 3 | -      | The fragments depict two constructions facing each other on a street                                                                                                                                                                                                                                                                                           | [1]           |
| 619ab     | 3 | -      | The fragments show a series of parallel, horizontal lines identified as rooms, perhaps commercial structures                                                                                                                                                                                                                                                   | [1,18]        |
| 621abcd   | 3 | V-13   | The inscription AEMILI[...] on these fragments could identify the <i>Pons Aemilius</i>                                                                                                                                                                                                                                                                         | [18,41,88–90] |

**Table S2.** Samples of group 2. The table includes the fragment label (ID), the number of shards analyzed (S), identification of the slab (if known), a short description and the relevant bibliography. Most data were retrieved from the Stanford Digital *Forma Urbis Romae* project (<http://formaurbis.stanford.edu>).

| ID                | S | Slab   | Description                                                                                                                                                                                                                                                                                                                                                                                                                                     | Bibliography   |
|-------------------|---|--------|-------------------------------------------------------------------------------------------------------------------------------------------------------------------------------------------------------------------------------------------------------------------------------------------------------------------------------------------------------------------------------------------------------------------------------------------------|----------------|
| 5Abcd             | 5 | IX-5   | One of the inscriptions [---] TORIAE, identifies the upper street visible in the fragments as Victory Street. The other street that runs obliquely from top left to bottom right corresponds to the Scaurus Street. A second inscription SEVERIETAN* / TONINIAV[---] / NN most probably refers to a building or place belonging to/built by Septimius Severus and Caracalla emperors                                                            | [1,18]         |
| 5a                | 1 | IX-5   | The fragment shows a section of the edge of the platform of the Temple to the Deified Claudius                                                                                                                                                                                                                                                                                                                                                  | [1,28,91,92]   |
| 5b                | 1 | IX-5   | The fragment retains parts of two letters, of which the second is an M. It has been identified as a section of the Temple of the Deified Claudius                                                                                                                                                                                                                                                                                               | [1,28,91,92]   |
| 5h                | 1 | IX-5   | The fragment depicts three parallel double lines. It has been identified as a section of the Temple of the Deified Claudius                                                                                                                                                                                                                                                                                                                     | [1,28,91,92]   |
| 8a                | 1 | VIII-5 | The inscription SEPT*[---] identifies the <i>Septizodium</i> monument                                                                                                                                                                                                                                                                                                                                                                           | [93]           |
| 8c                | 1 | VIII-5 | The inscription C[---] identifies the <i>Circus Maximus</i>                                                                                                                                                                                                                                                                                                                                                                                     | [9]            |
| 11c               | 1 | VII-7  | Series of buildings with shops and atrium houses. The horizontal street that traverses the upper part of the fragment has been identified as the <i>Vicus Patricius</i>                                                                                                                                                                                                                                                                         | [44,94]        |
| 11fgh             | 1 | VII-7  | The fragments depict a series of shops, a warehouse and two unidentified buildings                                                                                                                                                                                                                                                                                                                                                              | [1,44,45,95]   |
| 18a               | 1 | VII-11 | The inscription [...]S*TORIS on the fragment could identify the Temple of Castor. The small structure quadrangular depicted above the inscription has been identified as the Fountain of Juturna                                                                                                                                                                                                                                                | [47–49,96]     |
| 28a               | 1 | VI-9   | The fragment shows an industrial space and maybe a storage at the waterfront of the Tiber. The circular feature at the lower left could represent the Temple of Fors Fortuna                                                                                                                                                                                                                                                                    | [80,97]        |
| 28c               | 1 | VI-9   | The fragment could contain the representation of the huge artificial reservoir called the <i>Naumachia Transtiberina</i> of Augustus (see Coarelli 1992). The <i>Via Portuense</i> and the waterfront of the Tiber are represented too. Taylor moves the location of the <i>Naumachia Transtiberina</i> further north, in an extended rectangular area near the actual church of <i>S. Francesco a Ripa</i> and the <i>Via della Lungaretta</i> | [80,81,98–100] |
| 29f               | 1 | V-9    | The inscription [---]VLPIA identified the Basilica Ulpia in the Forum of Trajan                                                                                                                                                                                                                                                                                                                                                                 | [1,78,101]     |
| 29g               | 1 | V-9    | The fragment depicts a section of the Forum of Trajan                                                                                                                                                                                                                                                                                                                                                                                           | [1,102]        |
| 31cc              | 1 | V-12   | The fragment depicts two porticoed structures identified as the <i>Porticus Octaviae</i> and <i>Philippi</i>                                                                                                                                                                                                                                                                                                                                    | [1,103–106]    |
| 31h               | 1 | V-12   | The fragment depicts part of two temples, probably the Temple of <i>Ianus</i> and the Temple of <i>Iuno Sospita</i>                                                                                                                                                                                                                                                                                                                             | [1]            |
| 31ii              | 1 | V-12   | The inscription [---] CIR / FLAMI [.] [---] identifies the <i>Circus Flaminius</i>                                                                                                                                                                                                                                                                                                                                                              | [24,104]       |
| 31ll <sup>1</sup> | 1 | V-12   | The inscription [---]CUS / [---] NIUS identifies the <i>Circus Flaminius</i>                                                                                                                                                                                                                                                                                                                                                                    | [24]           |
| 31qrs             | 2 | V-12   | The inscription [---] HEAT*[---] / [.]AR [.] [---] identifies the Theater of <i>Marcellus</i>                                                                                                                                                                                                                                                                                                                                                   | [1,107,108]    |

|           |   |        |                                                                                                                                                    |                   |
|-----------|---|--------|----------------------------------------------------------------------------------------------------------------------------------------------------|-------------------|
| 36b       | 1 | III-9  | The inscription TEM PL [---] labels a temple. Rodríguez-Almeida identified it as the <i>Templum Matidiae</i>                                       | [1,51,109]        |
| 37a       | 1 | IV-6   | The fragment depicts two temples, A and B in the <i>Largo Argentina</i> and the Porticus of Pompey                                                 | [18,110–113]      |
| 40cdefgh  | 2 | III-12 | Fragments depict a section of blocks (insulae) in the Field of Mars. A vertical street partially labelled seems to be the <i>Vicus Stabularius</i> | [41,114]          |
| 46acd     | 1 | -      | The inscription [---] [.JDO[.] [---] identified the Adonaea Gardens                                                                                | [28,115,116]      |
| 68ab      | 1 | -      | The fragments depict part of a large building with two colonnades and a large exedra. It could be part of the Adonaea                              | [55]              |
| 70a       | 1 | VII-11 | The inscription [---]NAE. refers to the temple of the Deified Faustina on the Palatine                                                             | [46]              |
| 70b       | 2 | VII-11 | The fragment depicts two parallel lines of columns (temple of Faustina)                                                                            | [46]              |
| 70c       | 2 | VII-11 | The inscription [---] ST [---] refers to the temple of the Deified Faustina on the Palatine                                                        | [46]              |
| 103       | 1 | VII-11 | The fragment depicts the front corner of a temple identified as the Temple of the Deified Faustina on the Palatine                                 | [46]              |
| 238a      | 1 | IV-6   | The fragment shows part of a temple, perhaps the Temple of Mars                                                                                    | [53]              |
| 307ab     | 2 | III-12 | The fragments represent rows of back-to-back shops (tabernae) and a street labelled as [---]ORV[---]                                               | [1,18,54]         |
| 452ab     | 1 | VIII-5 | The fragments depict a wide street flanked by porticoes with shops                                                                                 | [1,56,57,117,118] |
| 452d      | 1 | VIII-5 | The inscription [---] ETAE [.] [---] could identified the small building with temple as the <i>Curiae Vetaeres</i>                                 | [1,56,57,117,118] |
| 499       | 1 | V-12   | The fragment depicts a staircase and a temple, perhaps the temple of Fides                                                                         | [58,121]          |
| 517abcdef | 2 | -      | The fragment shows an urban sector in the area north of the Forum of Trajan                                                                        | [1,18,45,50]      |
| 590       | 1 | VII-10 | On the right side of the fragment appears part of a large staircase                                                                                | [45]              |

<sup>1</sup>This sample does not appear within the Stanford Digital *Forma Urbis Romae* project database.

**Table S3.** Samples of group 3 (isolated samples). The table includes the fragment label (ID), identification of the slab (if known), a short description and the relevant bibliography. Most data were retrieved from the Stanford Digital *Forma Urbis Romae* project (<http://formaurbis.stanford.edu>).

| ID      | Slab   | Description                                                                                                                                                                                                                                                                                                                                                                   | Bibliography   |
|---------|--------|-------------------------------------------------------------------------------------------------------------------------------------------------------------------------------------------------------------------------------------------------------------------------------------------------------------------------------------------------------------------------------|----------------|
| 2a      | XI-10  | The inscription NA[---] along with fragment 2b could refer to a lower military ship yard                                                                                                                                                                                                                                                                                      | [1,45]         |
| 4a      | X-5    | The inscription AQVE / DVCTI / VM refers to the Neronian branch of the <i>Aqua Claudia</i>                                                                                                                                                                                                                                                                                    | [1,119]        |
| fn9     | VII-13 | The fragment depicts a row of shops and a street with the original red paint, maybe commercial buildings next to the <i>Circus Maximus</i>                                                                                                                                                                                                                                    | [7]            |
| 10g     | VIII-3 | Large section of the residential and commercial district called the Subura                                                                                                                                                                                                                                                                                                    | [40,41,44,77]  |
| 16a     | VI-5   | The fragment depicts the Temple of Peace, the <i>Porticus Absidata</i> , the <i>Forum Transitorium</i> with the Temple of Minerva and the Forum of Augustus                                                                                                                                                                                                                   | [1,9,120,121]  |
| 21c     | VII-14 | The inscription BAL refers to the Baths of <i>L. Licinius Sura</i> . In the lower side of the fragment an unidentified temple is also depicted                                                                                                                                                                                                                                | [122]          |
| 22b     | VII-15 | The inscriptions MINER / BAE and CORNIFICIA[---] identified two temples respectively: the Temple of Minerva and the Temple of Diana                                                                                                                                                                                                                                           | [1,123–126]    |
| 24c     | VII-8  | In the center of the fragment the structure of the <i>Porticus Aemilia</i> is depicted. Other structures represented are three parallel buildings visible in the top left corner, most probably warehouses of imperial estate (the <i>praedia Galbae</i> or <i>Galbana</i> ) and the funerary monument of <i>Ser. Sulpicius Galba</i> in the top left corner of this fragment | [1,86,127–131] |
| 25a     | VII-20 | The inscription HORREA / LOLLIANA identified the Lollian Warehouses. The building in the lower side of the fragment could be interpreted as a bath complex or as possible headquarters of an organization. The blank space along the right side of the fragment represents the Tiber                                                                                          | [1,47,132,133] |
| fn30    | -      | The fragment has been recently published with inventory number 36403. It depicts two parallel streets, overlooked by numerous buildings, sometimes preceded by porticoes                                                                                                                                                                                                      | [7]            |
| fn37    | -      | The fragment has been recently published with inventory number 36409. It depicts part of a neighbourhood with two streets perpendicular to each other and two buildings with rectangular rooms (shops?)                                                                                                                                                                       | [7]            |
| 38      | III-10 | The inscription [---]E*RMAR / [---] PAE identified the Baths of Agrippa                                                                                                                                                                                                                                                                                                       | [1,23,134]     |
| 44abcde | -      | The inscription H[---]REA / CANDELAR[.] identified the <i>Horrea Candelaria</i> and refers to the warehouses and the market for candles or perhaps more generally for lighting materials                                                                                                                                                                                      | [1,41,45]      |
| 85      | -      | The fragment shows an inscription in large letters comprising a D                                                                                                                                                                                                                                                                                                             | [1,18]         |
| 89      | -      | The fragment depicts a complex of large enclosed areas on the edge of a space without constructions                                                                                                                                                                                                                                                                           | [1]            |
| 108ab   | -      | The fragments depict a section with arcaded shops and a courtyard                                                                                                                                                                                                                                                                                                             | [1,45]         |
| 119     | -      | The fragment depicts a street, a row of large rooms probably shops and another building                                                                                                                                                                                                                                                                                       | [1,45]         |
| 159     | -      | The fragment depicts two parallel lines; a staircase and four rooms                                                                                                                                                                                                                                                                                                           | [1]            |

|        |      |                                                                                                                                                                                       |              |
|--------|------|---------------------------------------------------------------------------------------------------------------------------------------------------------------------------------------|--------------|
| 171    | -    | The fragment depicts a colonnade on the left side, in the centre various rooms and on the right side an area with rests of apsidal building                                           | [1]          |
| 184    | -    | The fragment depicts vast and irregular enclosures, roads, clusters and rows of outdoor spaces                                                                                        | [1,95]       |
| 190    | -    | The fragment depicts a group of three rooms                                                                                                                                           | [1]          |
| 195    | -    | Section of non-identified inscription [---]AE                                                                                                                                         | [1,45]       |
| 200b   | -    | The inscription S[.]reconstructed as TIBERIS could refer to the Tiber River. An alternative identification suggests that it refers to the <i>campus Martialis</i> on the Caelian Hill | [45,135]     |
| 201    | -    | The fragment depicts parts of two large areas; the upper one trapezoidal with rooms on two sides and the lower one rectangular                                                        | [1]          |
| 212b   | VI-6 | The inscription [---]ANVS[---] could refer to the Temple of Janus                                                                                                                     | [19,136,137] |
| 216    | -    | The inscription [---]M*INA[---] could refer to the Viminal Hill                                                                                                                       | [1,45]       |
| 232abc | -    | The fragments depict long parallel strips (gardens?)                                                                                                                                  | [1]          |
| 234abc | -    | The fragments depict three temples within an enclosed area                                                                                                                            | [1,51,138]   |
| 330    | -    | The fragment depicts single- and multi-storey apartment complexes, shops and a small bath                                                                                             | [1,45]       |
| 348    | -    | The fragment depicts a row of rooms, some of which are preceded by portico                                                                                                            | [1]          |
| 366    | -    | The fragment depicts a peripteral podium temple with the crenellated outer wall of the <i>cella</i>                                                                                   | [1,45]       |
| 471    | -    | The fragment depicts a set of long lines surrounded by large blank spaces, perhaps they refer to a circus or stadium                                                                  | [1,45]       |
| 484    | -    | The fragment depicts groups of regular buildings separated by streets                                                                                                                 | [1]          |
| 487ab  | -    | The fragments depict two groups of rooms of various sizes                                                                                                                             | [1]          |
| 501    | -    | The fragment depicts a section of buildings with open spaces                                                                                                                          | [1]          |
| 599    | -    | The fragment depicts four parallel rows of shops                                                                                                                                      | [1,18]       |
| 603    | -    | The inscription on the fragment retains the letter A and part of another letter                                                                                                       | [1,18]       |
| 665    | -    | The fragment depicts a double row of columns one of which is flanked by a row of rooms                                                                                                | [1]          |

**Table S4.**  $\delta^{18}\text{O}$  and  $\delta^{13}\text{C}$  isotopic ratios for the measured marble fragments.

| Fragment          | $\delta^{18}\text{O}$ (‰) | $\delta^{13}\text{C}$ (‰) |
|-------------------|---------------------------|---------------------------|
| 1abcde            | 0.06                      | 2.60                      |
| 2a                | −0.29                     | 2.45                      |
| 4a                | −1.35                     | 2.72                      |
| 5Aa               | −0.76                     | 2.34                      |
| 5a                | 0.26                      | 2.85                      |
| 5h                | −0.37                     | 2.66                      |
| 7a                | −0.31                     | 2.49                      |
| 7b                | −0.39                     | 2.70                      |
| 7c                | −0.31                     | 2.56                      |
| 7d                | −0.48                     | 2.32                      |
| 8a                | 0.18                      | 2.85                      |
| 8c                | 0.01                      | 2.72                      |
| fn9               | −2.13                     | 2.99                      |
| 10a               | 0.26                      | 2.33                      |
| 10d               | 0.73                      | 2.77                      |
| 10e               | −0.10                     | 2.40                      |
| 10g               | 0.12                      | 2.42                      |
| 10opqr            | −0.23                     | 2.71                      |
| 11c               | −1.30                     | 2.89                      |
| 11fgh             | −1.72                     | 2.81                      |
| 13l <sup>1</sup>  | −0.38                     | 2.15                      |
| 16a               | −0.24                     | 2.38                      |
| 18a               | −0.75                     | 2.48                      |
| 21c               | −2.20                     | 2.67                      |
| 22b               | −2.13                     | 2.86                      |
| 24c               | 0.11                      | 2.30                      |
| 25a               | −0.25                     | 2.48                      |
| 27a <sup>1</sup>  | −0.86                     | 2.74                      |
| 28a               | −3.61                     | 1.90                      |
| 28c               | −4.09                     | 2.21                      |
| 29f               | −0.34                     | 2.68                      |
| 29g               | −0.98                     | 2.67                      |
| fn30              | −2.74                     | 3.18                      |
| fn31 <sup>2</sup> | −0.55                     | 1.67                      |
| 31cc              | −1.82                     | 1.48                      |
| 31h               | −2.25                     | 1.96                      |
| 31ii              | −2.35                     | 1.31                      |
| 31ll              | −1.33                     | 2.93                      |
| 31qrs             | −2.43                     | 2.51                      |
| 33abc             | −1.97                     | 2.21                      |
| 35ab              | −1.97                     | 1.93                      |
| 35cdefghi         | −2.12                     | 3.13                      |
| 35l               | −2.40                     | 2.60                      |
| 36b               | −1.84                     | 2.48                      |
| fn37              | 0.14                      | 3.10                      |
| 37a               | −1.02                     | 3.38                      |
| 38                | −2.06                     | 2.44                      |
| 40cdefgh          | 0.15                      | 2.11                      |

|                      |       |       |
|----------------------|-------|-------|
| 41abc                | −1.33 | 2.22  |
| 44abcde              | −0.37 | 2.60  |
| 46acd                | −1.22 | 2.49  |
| 57abc                | 0.43  | 2.65  |
| 68ab                 | −1.25 | 2.38  |
| 70a                  | −0.60 | 2.95  |
| 70b                  | −1.12 | 2.94  |
| 85                   | −1.16 | 2.69  |
| 89                   | −1.89 | 2.41  |
| 103                  | −0.33 | 2.66  |
| 108ab                | −1.14 | 2.82  |
| 119                  | −0.09 | 2.61  |
| 159                  | 0.74  | 2.52  |
| 165abd               | −0.15 | 2.55  |
| 171                  | −0.96 | 2.07  |
| 184                  | −1.51 | 2.86  |
| 190                  | −0.57 | 2.46  |
| 195                  | −0.03 | 2.79  |
| 200b                 | −0.68 | 2.58  |
| 201                  | 0.35  | 2.53  |
| 212b                 | 0.26  | 2.40  |
| 216                  | −2.14 | 2.52  |
| 232abc               | −0.98 | 2.27  |
| 234abc               | −1.48 | 2.32  |
| 238a                 | −2.61 | −0.68 |
| 277ab                | −0.80 | 1.95  |
| 307ab                | −1.07 | 2.93  |
| 330                  | −1.05 | 2.17  |
| 336ab                | 0.07  | 2.38  |
| 348                  | −2.57 | 2.93  |
| 362ab                | −1.06 | 2.59  |
| 366                  | −1.77 | 3.05  |
| 452d                 | −0.36 | 2.65  |
| 471                  | −2.87 | 2.42  |
| 484                  | −1.45 | 2.74  |
| 487ab                | −2.01 | 2.70  |
| 496ab                | 0.07  | 3.04  |
| 499                  | −2.59 | 1.31  |
| 501                  | −3.02 | 2.78  |
| 517abcdef            | −0.46 | 2.99  |
| 538abdefg            | −0.75 | 2.70  |
| 586ab                | −1.01 | 2.11  |
| 599                  | −2.09 | 2.97  |
| 603                  | −1.15 | 3.20  |
| 619ab                | 0.06  | 2.86  |
| 621abcd              | −0.60 | 2.70  |
| 665                  | −1.42 | 2.24  |
| fms1960 <sup>2</sup> | −1.42 | 1.58  |

<sup>1</sup> For these fragments isotopic ratios were the only measured parameters.

<sup>2</sup> These samples do not belong to the F.U.

**Table S5.** CL RGB triplets for the different analyzed samples including the averaged color and the three main color clusters for segmented images. Different samples from a given fragment are identified arbitrarily with a number of sample. Besides the averaged color, the color hue is also identified (blue (BL), brown (BR), gray (GRa), green (GR), violet (VI)). Color cluster triplets are also characterized with the percentage of pixels assigned to the cluster. N is the total number of color clusters.

| Fragment Sample | Averaged Color |    |     | H  | 1 <sup>st</sup> Color Cluster |    |     |    | 2 <sup>nd</sup> Color Cluster |    |     |    | 3 <sup>rd</sup> Color Cluster |     |     |    | N |
|-----------------|----------------|----|-----|----|-------------------------------|----|-----|----|-------------------------------|----|-----|----|-------------------------------|-----|-----|----|---|
|                 | R              | G  | B   |    | R                             | G  | B   | %  | R                             | G  | B   | %  | R                             | G   | B   | %  |   |
| 1abcde.1        | 44             | 47 | 102 | VI | 37                            | 34 | 79  | 47 | 43                            | 46 | 101 | 32 | 54                            | 56  | 115 | 20 | 3 |
| 1abcde.2        | 35             | 47 | 95  | BL | 31                            | 42 | 88  | 57 | 41                            | 54 | 106 | 43 |                               |     |     |    | 2 |
| 1abcde.3        | 33             | 47 | 104 | BL | 31                            | 41 | 94  | 57 | 38                            | 56 | 118 | 43 |                               |     |     |    | 2 |
| 2a              | 26             | 26 | 44  | BL | 28                            | 31 | 50  | 51 | 24                            | 23 | 39  | 49 |                               |     |     |    | 2 |
| 4a              | 27             | 34 | 70  | VI | 30                            | 38 | 75  | 58 | 22                            | 27 | 59  | 42 |                               |     |     |    | 2 |
| 5Aa             | 58             | 53 | 114 | VI | 54                            | 51 | 106 | 58 | 64                            | 61 | 130 | 42 |                               |     |     |    | 2 |
| 5Ab             | 30             | 39 | 98  | VI | 22                            | 31 | 86  | 51 | 34                            | 45 | 109 | 49 |                               |     |     |    | 2 |
| 5Ac.1           | 21             | 54 | 126 | BL | 16                            | 41 | 108 | 47 | 21                            | 55 | 129 | 32 | 28                            | 74  | 152 | 21 | 3 |
| 5Ac.2           | 11             | 37 | 95  | BL | 15                            | 46 | 110 | 59 | 10                            | 31 | 84  | 41 | 80                            | 225 | 220 | <1 | 3 |
| 5Ad             | 49             | 43 | 105 | VI | 44                            | 37 | 91  | 51 | 53                            | 50 | 119 | 49 |                               |     |     |    | 2 |
| 5a              | 29             | 34 | 78  | BL | 28                            | 31 | 72  | 63 | 35                            | 41 | 93  | 37 |                               |     |     |    | 2 |
| 5b              | 41             | 37 | 78  | BL | 37                            | 33 | 70  | 60 | 50                            | 47 | 90  | 40 |                               |     |     |    | 2 |
| 5h              | 30             | 39 | 83  | VI | 27                            | 36 | 77  | 32 | 31                            | 39 | 86  | 28 | 23                            | 26  | 59  | 28 | 4 |
| 7a              | 36             | 30 | 58  | VI | 40                            | 33 | 64  | 52 | 31                            | 25 | 51  | 48 |                               |     |     |    | 2 |
| 7b              | 39             | 31 | 60  | VI | 30                            | 25 | 48  | 44 | 43                            | 34 | 65  | 42 | 63                            | 48  | 81  | <1 | 3 |
| 7c              | 33             | 39 | 82  | VI | 29                            | 34 | 72  | 62 | 43                            | 51 | 98  | 38 |                               |     |     |    | 2 |
| 7d              | 68             | 39 | 62  | VI | 54                            | 35 | 65  | 43 | 76                            | 50 | 77  | 28 | 74                            | 33  | 47  | <1 | 3 |
| 8a              | 42             | 44 | 98  | VI | 50                            | 52 | 113 | 50 | 34                            | 37 | 80  | 50 |                               |     |     |    | 2 |
| 8c              | 36             | 40 | 83  | VI | 33                            | 35 | 74  | 52 | 41                            | 43 | 92  | 48 |                               |     |     |    | 2 |
| fn9             | 4              | 22 | 58  | BL | 4                             | 20 | 54  | 61 | 5                             | 27 | 66  | 39 |                               |     |     |    | 2 |
| 10a             | 41             | 40 | 84  | VI | 49                            | 47 | 96  | 55 | 37                            | 35 | 75  | 45 |                               |     |     |    | 2 |
| 10d             | 54             | 44 | 82  | VI | 63                            | 52 | 94  | 52 | 47                            | 37 | 72  | 48 |                               |     |     |    | 2 |
| 10e             | 35             | 35 | 79  | VI | 33                            | 32 | 72  | 65 | 45                            | 43 | 93  | 35 |                               |     |     |    | 2 |
| 10g             | 40             | 33 | 68  | VI | 46                            | 38 | 75  | 59 | 37                            | 30 | 64  | 41 |                               |     |     |    | 2 |
| 10opqr.1        | 40             | 62 | 144 | BL | 33                            | 49 | 127 | 55 | 46                            | 70 | 156 | 45 |                               |     |     |    | 2 |
| 10opqr.2        | 40             | 48 | 118 | BL | 34                            | 40 | 102 | 56 | 43                            | 54 | 133 | 44 |                               |     |     |    | 2 |
| 10opqr.3        | 46             | 45 | 109 | VI | 38                            | 37 | 95  | 52 | 52                            | 55 | 126 | 48 |                               |     |     |    | 2 |
| 11c             | 5              | 16 | 36  | BR | 4                             | 15 | 33  | 70 | 7                             | 23 | 48  | 30 |                               |     |     |    | 2 |
| 11fgh           | 11             | 20 | 44  | GR | 12                            | 22 | 49  | 55 | 9                             | 17 | 40  | 45 |                               |     |     |    | 2 |
| 16a             | 59             | 40 | 56  | VI | 65                            | 47 | 63  | 51 | 51                            | 33 | 49  | 49 |                               |     |     |    | 2 |
| 18a             | 5              | 29 | 95  | BL | 5                             | 26 | 83  | 51 | 6                             | 36 | 108 | 49 |                               |     |     |    | 2 |
| 21c             | 4              | 27 | 64  | BL | 4                             | 31 | 74  | 59 | 4                             | 22 | 58  | 41 |                               |     |     |    | 2 |
| 22b             | 3              | 23 | 65  | BR | 6                             | 28 | 75  | 59 | 1                             | 19 | 59  | 41 |                               |     |     |    | 2 |
| 24c             | 5              | 36 | 91  | BL | 6                             | 38 | 99  | 55 | 5                             | 31 | 80  | 45 |                               |     |     |    | 2 |
| 25a             | 45             | 47 | 90  | BL | 53                            | 57 | 104 | 35 | 44                            | 47 | 88  | 29 | 36                            | 37  | 67  | 27 | 4 |
| 28a             | 49             | 42 | 75  | VI | 56                            | 48 | 87  | 52 | 42                            | 35 | 66  | 48 |                               |     |     |    | 2 |
| 28c             | 20             | 36 | 75  | BL | 16                            | 30 | 65  | 57 | 26                            | 43 | 89  | 43 |                               |     |     |    | 2 |
| 29f             | 4              | 29 | 79  | BL | 2                             | 26 | 72  | 52 | 5                             | 35 | 89  | 48 |                               |     |     |    | 2 |
| 29g             | 3              | 26 | 72  | BL | 4                             | 30 | 79  | 53 | 2                             | 21 | 63  | 47 |                               |     |     |    | 2 |
| fn30            | 10             | 36 | 73  | BL | 11                            | 39 | 78  | 52 | 9                             | 33 | 69  | 48 |                               |     |     |    | 2 |
| 31cc            | 6              | 23 | 82  | BR | 5                             | 18 | 73  | 56 | 9                             | 28 | 94  | 44 |                               |     |     |    | 2 |
| 31h             | 6              | 17 | 47  | BR | 7                             | 20 | 54  | 50 | 4                             | 14 | 41  | 50 |                               |     |     |    | 2 |
| 31ii            | 19             | 28 | 81  | BL | 15                            | 21 | 69  | 54 | 21                            | 33 | 93  | 46 |                               |     |     |    | 2 |
| 31ll            | 9              | 21 | 66  | BR | 8                             | 20 | 60  | 63 | 13                            | 26 | 79  | 37 |                               |     |     |    | 2 |



|                   |    |    |     |     |    |    |     |    |     |    |     |    |    |    |     |    |  |  |   |
|-------------------|----|----|-----|-----|----|----|-----|----|-----|----|-----|----|----|----|-----|----|--|--|---|
| 31qrs.1           | 3  | 19 | 54  | BR  | 3  | 21 | 59  | 52 | 2   | 17 | 50  | 48 |    |    |     |    |  |  | 2 |
| 31qrs.2           | 3  | 24 | 65  | BL  | 5  | 29 | 75  | 63 | 2   | 20 | 60  | 37 |    |    |     |    |  |  | 2 |
| fn31 <sup>1</sup> | 54 | 34 | 38  | BR  | 23 | 16 | 23  | 62 | 41  | 23 | 19  | 38 |    |    |     |    |  |  | 2 |
| 33abc.1           | 3  | 39 | 120 | BR  | 4  | 46 | 132 | 51 | 2   | 32 | 105 | 49 |    |    |     |    |  |  | 2 |
| 33abc.2           | 3  | 33 | 100 | BR  | 0  | 27 | 92  | 51 | 4   | 38 | 109 | 49 |    |    |     |    |  |  | 2 |
| 33abc.3           | 3  | 37 | 107 | BL  | 3  | 32 | 100 | 59 | 4   | 43 | 120 | 41 |    |    |     |    |  |  | 2 |
| 35ab              | 2  | 29 | 87  | BL  | 1  | 25 | 85  | 42 | 0   | 18 | 61  | 40 | 4  | 35 | 100 | 18 |  |  | 3 |
| 35cdefghi         | 2  | 24 | 71  | BR  | 1  | 19 | 65  | 57 | 3   | 31 | 79  | 43 |    |    |     |    |  |  | 2 |
| 35lpqr            | 21 | 28 | 78  | BL  | 16 | 25 | 68  | 55 | 32  | 31 | 91  | 45 |    |    |     |    |  |  | 2 |
| 36b               | 16 | 30 | 85  | BL  | 21 | 35 | 98  | 52 | 15  | 25 | 74  | 48 |    |    |     |    |  |  | 2 |
| 37a               | 42 | 45 | 86  | BL  | 38 | 40 | 79  | 59 | 51  | 52 | 98  | 41 |    |    |     |    |  |  | 2 |
| fn37              | 97 | 69 | 95  | GRa | 98 | 72 | 101 | 48 | 121 | 97 | 121 | 36 | 81 | 55 | 80  | 16 |  |  | 3 |
| 38                | 33 | 40 | 80  | VI  | 31 | 36 | 74  | 61 | 38  | 46 | 92  | 39 |    |    |     |    |  |  | 2 |
| 40cdefgh.1        | 22 | 40 | 93  | BL  | 25 | 46 | 103 | 57 | 20  | 33 | 86  | 43 |    |    |     |    |  |  | 2 |
| 40cdefgh.2        | 24 | 42 | 101 | BL  | 26 | 50 | 114 | 56 | 22  | 35 | 90  | 44 |    |    |     |    |  |  | 2 |
| 41abc.1           | 59 | 55 | 101 | VI  | 53 | 44 | 91  | 46 | 61  | 55 | 101 | 34 | 74 | 70 | 120 | 20 |  |  | 3 |
| 41abc.2           | 54 | 44 | 75  | VI  | 50 | 37 | 63  | 50 | 61  | 50 | 84  | 50 |    |    |     |    |  |  | 2 |
| 41abc.3           | 49 | 46 | 87  | VI  | 57 | 55 | 95  | 53 | 41  | 35 | 73  | 47 |    |    |     |    |  |  | 2 |
| 44abcde           | 28 | 25 | 48  | BL  | 29 | 25 | 48  | 41 | 36  | 32 | 59  | 36 | 23 | 20 | 41  | 23 |  |  | 3 |
| 46acd             | 44 | 33 | 60  | VI  | 38 | 26 | 48  | 41 | 46  | 36 | 63  | 40 | 54 | 45 | 76  | 20 |  |  | 3 |
| 57abc.1           | 30 | 52 | 112 | BL  | 33 | 57 | 119 | 52 | 25  | 44 | 102 | 48 |    |    |     |    |  |  | 2 |
| 57abc.2           | 31 | 48 | 104 | BL  | 29 | 40 | 94  | 55 | 34  | 54 | 117 | 45 |    |    |     |    |  |  | 2 |
| 68ab              | 50 | 35 | 62  | VI  | 56 | 41 | 70  | 52 | 43  | 30 | 56  | 48 |    |    |     |    |  |  | 2 |
| 70a               | 2  | 17 | 53  | BR  | 2  | 20 | 60  | 50 | 1   | 16 | 47  | 50 |    |    |     |    |  |  | 2 |
| 70b.1             | 2  | 29 | 99  | BL  | 1  | 37 | 111 | 50 | 2   | 21 | 87  | 50 |    |    |     |    |  |  | 2 |
| 70b.2             | 4  | 17 | 55  | BR  | 1  | 13 | 51  | 36 | 4   | 19 | 62  | 30 | 10 | 29 | 88  | 25 |  |  | 4 |
| 70c.1             | 2  | 22 | 69  | BR  | 1  | 18 | 61  | 60 | 5   | 28 | 82  | 40 |    |    |     |    |  |  | 2 |
| 70c.2             | 3  | 32 | 93  | BL  | 4  | 37 | 104 | 50 | 3   | 25 | 83  | 50 |    |    |     |    |  |  | 2 |
| 85                | 27 | 20 | 33  | VI  | 23 | 17 | 29  | 57 | 30  | 24 | 38  | 43 |    |    |     |    |  |  | 2 |
| 89                | 61 | 44 | 65  | VI  | 55 | 38 | 57  | 53 | 69  | 51 | 75  | 47 |    |    |     |    |  |  | 2 |
| 103               | 17 | 33 | 101 | BL  | 15 | 24 | 79  | 65 | 19  | 37 | 111 | 35 |    |    |     |    |  |  | 2 |
| 108ab             | 1  | 16 | 54  | BR  | 1  | 14 | 48  | 53 | 2   | 17 | 60  | 47 |    |    |     |    |  |  | 2 |
| 119               | 42 | 38 | 68  | VI  | 52 | 49 | 80  | 68 | 39  | 34 | 64  | 32 |    |    |     |    |  |  | 2 |
| 159               | 39 | 43 | 81  | BL  | 34 | 42 | 78  | 62 | 49  | 49 | 87  | 38 |    |    |     |    |  |  | 2 |
| 165abd.1          | 48 | 42 | 76  | VI  | 53 | 47 | 85  | 55 | 42  | 37 | 69  | 45 |    |    |     |    |  |  | 2 |
| 165abd.2          | 52 | 55 | 104 | VI  | 51 | 54 | 105 | 50 | 43  | 42 | 86  | 29 | 73 | 73 | 127 | 20 |  |  | 3 |
| 165abd.3          | 46 | 54 | 108 | BL  | 49 | 56 | 111 | 45 | 40  | 42 | 91  | 36 | 60 | 74 | 135 | 19 |  |  | 3 |
| 171               | 59 | 43 | 63  | VI  | 76 | 57 | 79  | 37 | 67  | 48 | 68  | 29 | 57 | 42 | 63  | 21 |  |  | 5 |
| 184               | 1  | 31 | 94  | BL  | 1  | 27 | 84  | 57 | 2   | 33 | 100 | 43 |    |    |     |    |  |  | 2 |
| 190               | 13 | 37 | 95  | BL  | 12 | 33 | 90  | 67 | 16  | 44 | 107 | 33 |    |    |     |    |  |  | 2 |
| 195               | 23 | 38 | 93  | BL  | 22 | 34 | 86  | 63 | 27  | 47 | 106 | 37 |    |    |     |    |  |  | 2 |
| 200b              | 30 | 34 | 69  | VI  | 62 | 71 | 130 | 52 | 55  | 57 | 108 | 48 |    |    |     |    |  |  | 2 |
| 201               | 47 | 56 | 117 | BL  | 44 | 53 | 110 | 65 | 55  | 64 | 133 | 35 |    |    |     |    |  |  | 2 |
| 212b              | 55 | 59 | 108 | VI  | 53 | 54 | 102 | 61 | 61  | 68 | 123 | 39 |    |    |     |    |  |  | 2 |
| 216               | 42 | 38 | 78  | VI  | 38 | 32 | 70  | 61 | 49  | 46 | 89  | 39 |    |    |     |    |  |  | 2 |
| 232abc            | 15 | 24 | 48  | GR  | 13 | 21 | 44  | 51 | 18  | 28 | 53  | 49 |    |    |     |    |  |  | 2 |
| 234abc            | 15 | 52 | 136 | BL  | 26 | 86 | 174 | 40 | 16  | 60 | 155 | 27 | 13 | 50 | 139 | 25 |  |  | 5 |
| 238a              | 15 | 37 | 106 | BL  | 19 | 42 | 118 | 55 | 14  | 34 | 97  | 45 |    |    |     |    |  |  | 2 |
| 277ab.1           | 19 | 56 | 132 | BL  | 23 | 60 | 141 | 54 | 17  | 50 | 121 | 46 |    |    |     |    |  |  | 2 |
| 277ab.2           | 11 | 39 | 106 | BL  | 16 | 48 | 123 | 42 | 8   | 35 | 102 | 35 | 6  | 27 | 82  | 27 |  |  | 3 |
| 277ab.3           | 28 | 53 | 124 | BL  | 30 | 48 | 114 | 78 | 33  | 75 | 157 | 22 |    |    |     |    |  |  | 2 |

|                      |    |    |     |    |    |    |     |     |    |     |     |    |    |    |     |    |   |
|----------------------|----|----|-----|----|----|----|-----|-----|----|-----|-----|----|----|----|-----|----|---|
| 277ab.4              | 27 | 46 | 102 | BL | 36 | 55 | 111 | 42  | 16 | 53  | 121 | 26 | 21 | 38 | 90  | 24 | 5 |
| 307a                 | 4  | 33 | 86  | BR | 6  | 38 | 97  | 51  | 2  | 28  | 77  | 49 |    |    |     |    | 2 |
| 307b                 | 11 | 26 | 66  | BL | 13 | 30 | 73  | 56  | 9  | 22  | 57  | 44 |    |    |     |    | 2 |
| 330                  | 14 | 38 | 108 | BL | 10 | 33 | 101 | 57  | 17 | 45  | 119 | 43 |    |    |     |    | 2 |
| 336a                 | 23 | 41 | 96  | BL | 19 | 34 | 77  | 57  | 28 | 47  | 105 | 43 |    |    |     |    | 2 |
| 336b                 | 29 | 43 | 104 | BL | 33 | 48 | 115 | 56  | 24 | 36  | 88  | 44 |    |    |     |    | 2 |
| 348                  | 4  | 33 | 70  | BR | 6  | 38 | 79  | 57  | 4  | 28  | 64  | 43 |    |    |     |    | 2 |
| 362a                 | 28 | 40 | 104 | GR | 30 | 46 | 121 | 59  | 25 | 35  | 96  | 41 |    |    |     |    | 2 |
| 362b                 | 32 | 42 | 107 | BL | 30 | 35 | 93  | 57  | 38 | 52  | 127 | 43 |    |    |     |    | 2 |
| 366                  | 2  | 26 | 65  | BL | 1  | 23 | 60  | 58  | 2  | 31  | 75  | 42 |    |    |     |    | 2 |
| 452ab                | 34 | 40 | 93  | VI | 39 | 45 | 103 | 50  | 28 | 34  | 82  | 50 |    |    |     |    | 2 |
| 452d                 | 27 | 44 | 101 | BL | 34 | 58 | 120 | 45  | 29 | 44  | 101 | 31 | 21 | 33 | 85  | 24 | 3 |
| 471                  | 20 | 37 | 97  | BL | 17 | 34 | 86  | 58  | 22 | 45  | 115 | 42 |    |    |     |    | 2 |
| 484                  | 3  | 11 | 37  | BL | 3  | 9  | 33  | 51  | 4  | 13  | 42  | 49 |    |    |     |    | 2 |
| 487ab                | 8  | 41 | 124 | BL | 8  | 43 | 125 | 47  | 10 | 49  | 142 | 28 | 7  | 34 | 105 | 25 | 3 |
| 496ab.1              | 32 | 58 | 125 | BL | 37 | 67 | 140 | 58  | 30 | 51  | 114 | 42 |    |    |     |    | 2 |
| 496ab.2              | 37 | 51 | 107 | BL | 39 | 61 | 119 | 52  | 31 | 41  | 90  | 48 |    |    |     |    | 2 |
| 499                  | 17 | 33 | 87  | BL | 20 | 40 | 99  | 60  | 15 | 31  | 82  | 40 |    |    |     |    | 2 |
| 501                  | 11 | 47 | 119 | BL | 14 | 56 | 132 | 54  | 11 | 40  | 110 | 46 |    |    |     |    | 2 |
| 517abcdef.1          | 38 | 30 | 59  | VI | 33 | 24 | 51  | 51  | 42 | 33  | 64  | 49 |    |    |     |    | 2 |
| 517abcdef.2          | 42 | 45 | 103 | VI | 38 | 39 | 96  | 59  | 50 | 54  | 117 | 41 |    |    |     |    | 2 |
| 538abdefg.1          | 31 | 37 | 81  | VI | 27 | 30 | 71  | 53  | 35 | 43  | 90  | 47 |    |    |     |    | 2 |
| 538abdefg.2          | 22 | 31 | 69  | BL | 19 | 27 | 63  | 54  | 26 | 35  | 78  | 46 |    |    |     |    | 2 |
| 586a                 | 12 | 45 | 117 | BL | 13 | 57 | 132 | 60  | 9  | 38  | 106 | 40 |    |    |     |    | 2 |
| 586b.1               | 14 | 42 | 108 | BL | 17 | 52 | 120 | 65  | 12 | 37  | 101 | 35 |    |    |     |    | 2 |
| 586b.2               | 15 | 51 | 125 | BL | 11 | 39 | 112 | 31  | 15 | 48  | 119 | 31 | 19 | 58 | 133 | 29 | 4 |
| 590                  | 2  | 32 | 91  | BL | 1  | 40 | 105 | 64  | 2  | 27  | 83  | 36 |    |    |     |    | 2 |
| 599                  | 2  | 21 | 58  | BL | 2  | 18 | 52  | 63  | 4  | 27  | 68  | 37 |    |    |     |    | 2 |
| 603                  | 9  | 34 | 108 | BL | 9  | 35 | 110 | 37  | 10 | 30  | 99  | 28 | 8  | 24 | 83  | 20 | 4 |
| 619a                 | 17 | 40 | 104 | BL | 24 | 48 | 122 | 62  | 15 | 33  | 95  | 38 |    |    |     |    | 2 |
| 619b.1               | 18 | 47 | 113 | BL | 15 | 36 | 99  | 57  | 21 | 50  | 118 | 43 |    |    |     |    | 2 |
| 619b.2               | 25 | 38 | 84  | BL | 30 | 46 | 97  | 64  | 23 | 34  | 79  | 36 |    |    |     |    | 2 |
| 621abcd.1            | 8  | 25 | 68  | BR | 11 | 32 | 79  | 43  | 9  | 26  | 69  | 34 | 6  | 21 | 60  | 23 | 3 |
| 621abcd.2            | 4  | 19 | 57  | BR | 5  | 19 | 56  | 100 | 68 | 173 | 192 | 0  |    |    |     |    | 2 |
| 621abcd.3            | 7  | 32 | 87  | BR | 7  | 30 | 84  | 35  | 2  | 22  | 72  | 29 | 9  | 35 | 94  | 20 | 4 |
| 665                  | 63 | 44 | 75  | VI | 55 | 39 | 66  | 59  | 76 | 52  | 88  | 41 |    |    |     |    | 2 |
| fms1960 <sup>1</sup> | 57 | 44 | 59  | VI | 67 | 51 | 64  | 59  | 53 | 39  | 54  | 41 |    |    |     |    | 2 |

<sup>1</sup> These samples do not belong to the F.U.
